# Supplementary material for: Optical limiting properties of 3,5-diphenyldibenzo-azaBODIPY at 532 nm
Source: Royal Society of Chemistry journal article supplement (doi:10.1039/c7nj01503h), 2017-01-01
Supplement: c7nj01503h1.pdf [file c7nj01503h1.pdf]

## SUPPORTING INFORMATION

### Optical limiting properties of 3,5-diphenyldibenzo-azaBODIPY at 532 nm

Gugu Kubheka, Ojodomo Achadu, John Mack,\* and Tebello Nyokong

Centre for Nanotechnology Innovation, Department of Chemistry, Rhodes University, Grahamstown 6140, South Africa. Email: [j.mack@ru.ac.za](mailto:j.mack@ru.ac.za)

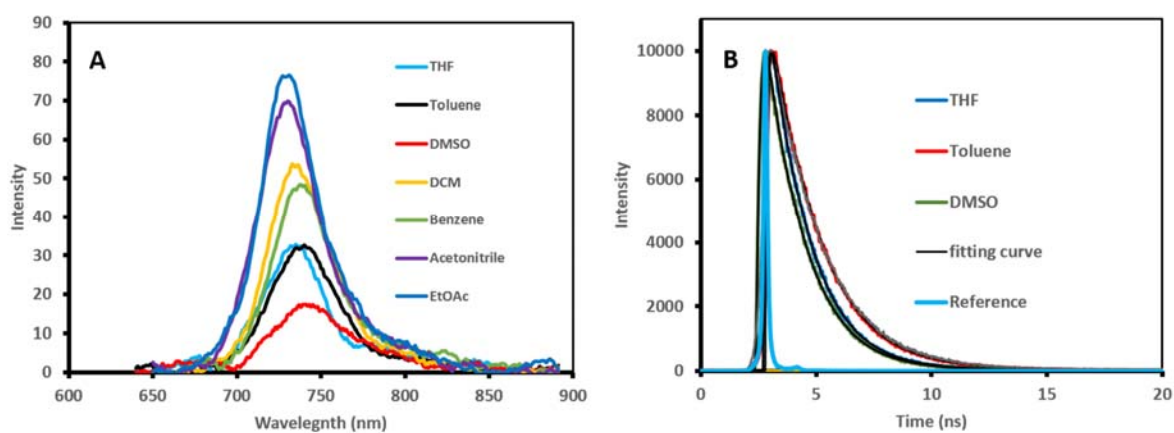

**Figure S1.** Fluorescence spectra of **1** (A) in different solvents-and (B) fluorescence decay curves of **1** in DMSO, THF and toluene.
